# Supplementary material for: Genome-wide analyses reveal the IRE1a-XBP1 pathway promotes T helper cell differentiation by resolving secretory stress and accelerating proliferation
Source: Genome Med. 2018 Oct 24;10:76. doi: 10.1186/s13073-018-0589-3 (PMC6199730; doi:10.1186/s13073-018-0589-3)
Supplement: Supplementary file 9 — Table S8. List of differentially expressed genes that regulate cell cycle. (XLSX 45 kb) [file 13073_2018_589_MOESM9_ESM.xlsx]

## Sheet: cellCycle_DEgenesTh2.txt
Crlf3	up-regulated
Anxa1	up-regulated
Actr3	up-regulated
Rhoc	up-regulated
Kif3b	up-regulated
Bid	up-regulated
Bmp7	up-regulated
Ensa	up-regulated
Zc3h12d	up-regulated
Timp2	up-regulated
Wtap	up-regulated
Jund	up-regulated
Capn3	up-regulated
Ccndbp1	up-regulated
Ifng	up-regulated
Rara	up-regulated
Pla2g16	up-regulated
Pim2	up-regulated
Rassf2	up-regulated
Bcl2l11	up-regulated
Trp53inp1	up-regulated
Bax	up-regulated
Psrc1	up-regulated
Prkacb	up-regulated
Rbbp4	up-regulated
Stat5b	up-regulated
Gnai3	up-regulated
Rb1	up-regulated
Cenpw	up-regulated
Rps27l	up-regulated
Stmn1	up-regulated
Lef1	up-regulated
Fam58b	up-regulated
Ccng1	up-regulated
Hdac3	up-regulated
Cebpa	up-regulated
Zfp365	up-regulated
Cetn2	up-regulated
Arpp19	up-regulated
Gnai1	up-regulated
Mapk1	up-regulated
Ntmt1	up-regulated
Haus2	up-regulated
Tal1	up-regulated
Fam175a	up-regulated
Dynlt3	up-regulated
Pin1	up-regulated
Seh1l	up-regulated
Sdcbp	up-regulated
Klhl22	up-regulated
Appl1	up-regulated
Xpo1	up-regulated
Naa50	up-regulated
Rrp8	up-regulated
Nsun2	up-regulated
Tfdp1	up-regulated
Plk3	up-regulated
Mapre2	up-regulated
Bcl2l1	up-regulated
Rps6ka3	up-regulated
Champ1	up-regulated
Nedd9	up-regulated
Tacc2	up-regulated
Tex15	up-regulated
Nup153	up-regulated
Il10	up-regulated
Skil	up-regulated
Sphk1	up-regulated
Id2	up-regulated
Nr4a3	up-regulated
Mapk6	up-regulated
Camk2d	up-regulated
Tnf	up-regulated
Chtf8	up-regulated
Tgfb1	up-regulated
Mzt1	up-regulated
Gata3	up-regulated
Psme3	up-regulated
Pim3	up-regulated
Spry1	up-regulated
Dixdc1	up-regulated
Nfatc1	up-regulated
Cacul1	up-regulated
Reep3	up-regulated
Fgf2	up-regulated
Gtpbp4	up-regulated
Csnk1a1	up-regulated
Prkca	up-regulated
Ptpn6	up-regulated
Thbs1	up-regulated
Slc6a4	up-regulated
Chd3	up-regulated
Bach1	up-regulated
Bop1	up-regulated
Eif4e	up-regulated
Ccnh	up-regulated
Txlng	up-regulated
Aatf	up-regulated
Rnf2	up-regulated
Usp39	up-regulated
Fosl1	up-regulated
Nle1	up-regulated
Rrs1	up-regulated
Myc	up-regulated
Rgcc	up-regulated
Zfp36l1	up-regulated
Arf6	up-regulated
Slc25a33	up-regulated
Stat5a	up-regulated
Arhgef2	up-regulated
Ctnnb1	up-regulated
Trim32	up-regulated
Dgkz	up-regulated
Ppm1g	up-regulated
Ikzf1	up-regulated
Id3	up-regulated
Cdkn1a	up-regulated
Pkn2	down-regulated
Ubr2	down-regulated
Ptpn3	down-regulated
Snx18	down-regulated
Nasp	down-regulated
Ndel1	down-regulated
Bub3	down-regulated
Tmem67	down-regulated
Lin54	down-regulated
Reep4	down-regulated
Daxx	down-regulated
Mad1l1	down-regulated
Sfpq	down-regulated
Pttg1	down-regulated
Ncapg	down-regulated
Spdl1	down-regulated
Asns	down-regulated
Dusp3	down-regulated
Grk5	down-regulated
Osm	down-regulated
Gbf1	down-regulated
Pkp4	down-regulated
Flna	down-regulated
Kif14	down-regulated
Atp2b4	down-regulated
Sh2b1	down-regulated
Avpi1	down-regulated
Gpsm2	down-regulated
Mcts1	down-regulated
Fem1b	down-regulated
Cdt1	down-regulated
Ncaph	down-regulated
Cdc25c	down-regulated
Snx9	down-regulated
Ier3	down-regulated
Cyp1a1	down-regulated
Cdkn2a	down-regulated
Calr	down-regulated
Ndrg1	down-regulated
Mnt	down-regulated
Gpnmb	down-regulated
Mapk7	down-regulated
Tbrg1	down-regulated
Mbd4	down-regulated
Tom1l2	down-regulated
Nek9	down-regulated
Pms2	down-regulated
Uvrag	down-regulated
Cdk5rap3	down-regulated
Bak1	down-regulated
Cdc14b	down-regulated
Brca1	down-regulated
Pml	down-regulated
Aurka	down-regulated
Tubg1	down-regulated
Jtb	down-regulated
Irf6	down-regulated
Pdpn	down-regulated
Piwil2	down-regulated
Ets1	down-regulated
Triobp	down-regulated
Sgk1	down-regulated
Rint1	down-regulated
Men1	down-regulated
Cul7	down-regulated
Vps4a	down-regulated
Dlgap5	down-regulated
Atad5	down-regulated
Chaf1a	down-regulated
Prr11	down-regulated
Lig1	down-regulated
Wdr62	down-regulated
Tpx2	down-regulated
Uhrf1	down-regulated
Cdca8	down-regulated
Cep192	down-regulated
Zw10	down-regulated
Camk2g	down-regulated
Tacc3	down-regulated
Espl1	down-regulated
Cdc20	down-regulated
Kif20a	down-regulated
Ints3	down-regulated
Mtbp	down-regulated
Lmnb1	down-regulated
Prcc	down-regulated
Stil	down-regulated
Ndc80	down-regulated
Racgap1	down-regulated
Ttk	down-regulated
Rbl2	down-regulated
Aurkb	down-regulated
Mcm7	down-regulated
Prc1	down-regulated
Ing1	down-regulated
Casp2	down-regulated
Nek2	down-regulated
Nek1	down-regulated
Plk1	down-regulated
Stag1	down-regulated
Cdc6	down-regulated
Cdc45	down-regulated
Mcm2	down-regulated
Mif	down-regulated
Cks1b	down-regulated
Katnb1	down-regulated
Cdca5	down-regulated
Ppp2r5b	down-regulated
Ddb1	down-regulated
Gmnn	down-regulated
Bub1b	down-regulated
Mcm6	down-regulated
Atf5	down-regulated
Lin37	down-regulated
Nusap1	down-regulated
Pstpip1	down-regulated
Arhgef10	down-regulated
Mad2l1bp	down-regulated
Mapk14	down-regulated
Gpr132	down-regulated
Cdca3	down-regulated
Ccng2	down-regulated
Cdkn1b	down-regulated
Nme6	down-regulated
Cd28	down-regulated
Chmp4b	down-regulated
Taok2	down-regulated
Marf1	down-regulated
Evi5	down-regulated
Cnppd1	down-regulated
Hinfp	down-regulated
Srpk2	down-regulated
Rgs14	down-regulated
Wrap73	down-regulated
Nr2c2	down-regulated
Ncapd2	down-regulated
Kif22	down-regulated
Prr5	down-regulated
Anapc2	down-regulated
Rptor	down-regulated
Wfs1	down-regulated
Pak4	down-regulated
Cast	down-regulated
Zfyve26	down-regulated
Golga2	down-regulated
Tspyl2	down-regulated
Uimc1	down-regulated
Specc1l	down-regulated
Zak	down-regulated
Clspn	down-regulated
Top2a	down-regulated
Dync1h1	down-regulated
Ckap5	down-regulated
Aspm	down-regulated
Cdk11b	down-regulated
Tnks	down-regulated
Whamm	down-regulated
Pcnt	down-regulated
Incenp	down-regulated
Gsk3b	down-regulated
Cdk8	down-regulated
Gem	down-regulated
Rgs2	down-regulated
Gadd45a	down-regulated
Rad21	down-regulated
Mcmbp	down-regulated
Ccnb1	down-regulated
Asun	down-regulated
Ect2	down-regulated
Phf8	down-regulated
Klhl9	down-regulated
Kif2c	down-regulated
Dna2	down-regulated
Bub1	down-regulated
Mcm5	down-regulated
Rb1cc1	down-regulated
Gas2	down-regulated
Anapc1	down-regulated
Cry1	down-regulated
Bcat1	down-regulated
Mei4	down-regulated
Cdc25a	down-regulated
C2cd3	down-regulated
Birc6	down-regulated
Smc2	down-regulated
Mcm4	down-regulated
Nup88	down-regulated
Mcm3	down-regulated
Ncapd3	down-regulated
Ncapg2	down-regulated
Cyp26b1	down-regulated
Pole	down-regulated
E2f8	down-regulated
Clasp1	down-regulated
Clasp2	down-regulated
Plrg1	down-regulated
Spg20	down-regulated
Ranbp2	down-regulated
Etaa1	down-regulated
Rbbp8	down-regulated
Topbp1	down-regulated
Phgdh	down-regulated
Mre11a	down-regulated
Pds5b	down-regulated
Inhba	down-regulated
Cdc27	down-regulated
